# Supplementary material
Source: HighWire-hosted journal article supplement (https://genome.cshlp.org/content/suppl/2004/04/02/14.4.591)

Figure 3B

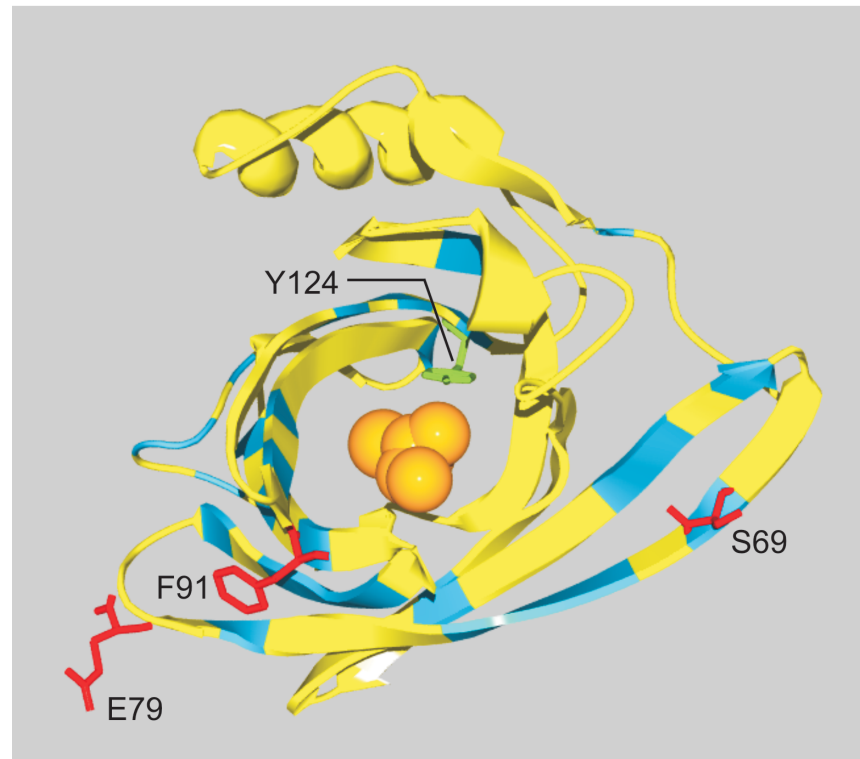

Supplement: Figure3B.pdf [file Figure3B.pdf]

Figure 5a

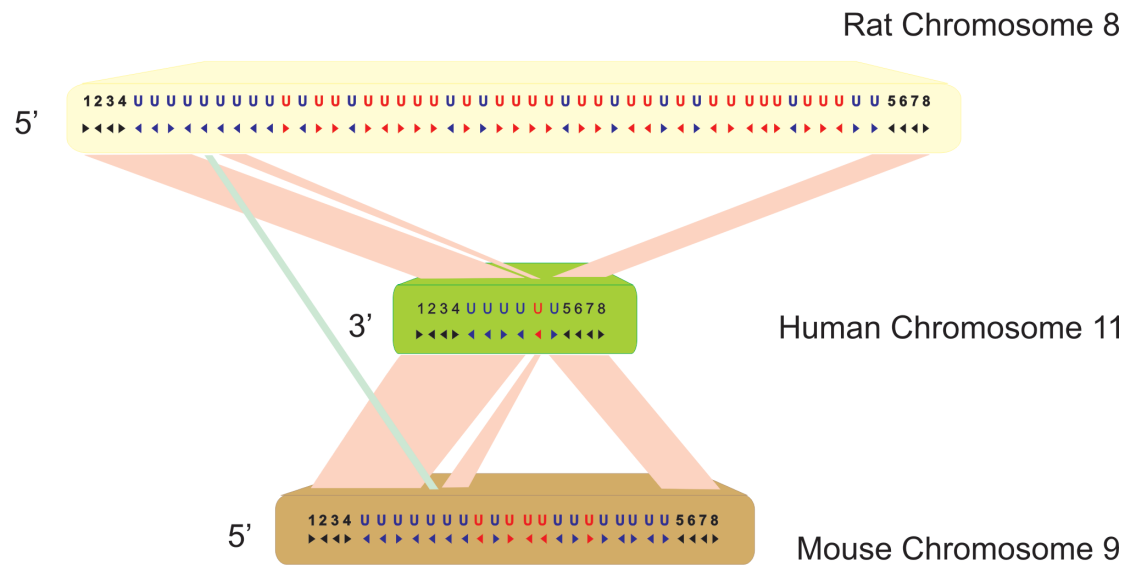

Supplement: Figure5A.pdf [file Figure5A.pdf]

Figure 1

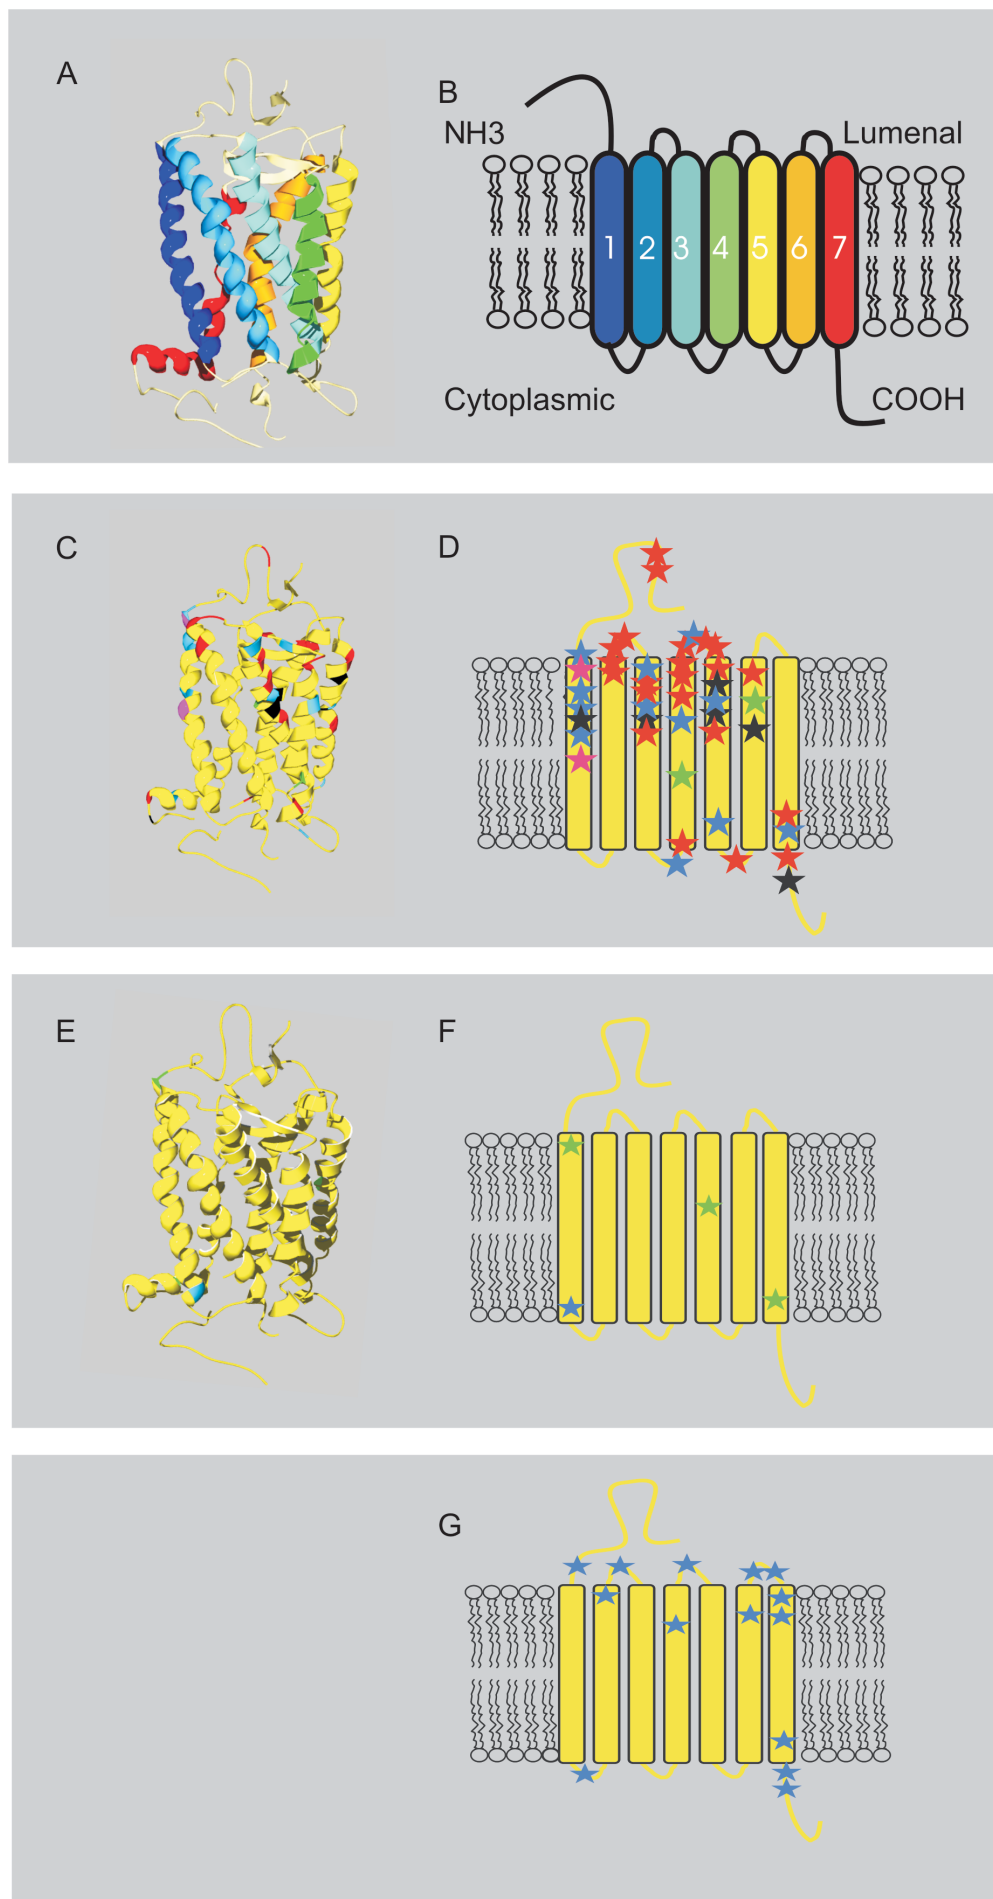

Supplement: figure1.pdf [file figure1.pdf]
